# Supplementary material
Source: ML conference proceedings conference paper supplement (https://proceedings.mlr.press/v70/wang17g.html)
Supplement: Supplementary file [file wang17g-supp.pdf]

## A. Localized generalized linear model as an RPM

Localization in generalized linear models (GLMs) is equivalent to reweighting, with constraints on the weight function  $w(\cdot)$  induced by  $p_w$ . We prelude the theorem with a simple illustration in linear regression.

Consider  $N$  iid observations  $\{(x_n, y_n)\}_1^N$ . We regress  $y$  against  $x$ :

$$y_n = \beta_1(x_n - \bar{x}) + \beta_0 + \epsilon_n, \epsilon_n \stackrel{iid}{\sim} N(0, \sigma^2),$$

where  $\bar{x} = \sum_{n=1}^N x_n$ . The maximum likelihood estimate of  $(\beta_0, \beta_1)$  is

$$(\hat{\beta}_0, \hat{\beta}_1) = \operatorname{argmin}_{\beta_0, \beta_1} \sum_{n=1}^N (y_n - \beta_1(x_n - \bar{x}) - \beta_0)^2.$$

The localized model is

$$y_n = \beta_{1n} \times (x_n - \bar{x}) + \beta_0 + \epsilon_n, \beta_{1n} \stackrel{iid}{\sim} N(\beta_1, \lambda^2), \epsilon_n \stackrel{iid}{\sim} N(0, \sigma^2),$$

where  $\{\beta_{1n}\}_{n=1}^N \perp \{\epsilon_n\}_{n=1}^N$ . Marginalizing out  $\beta_{1n}$ 's gives

$$y_n = \beta_1 \times (x_n - \bar{x}) + \beta_0 + \gamma_n, \gamma_n \stackrel{iid}{\sim} N(0, (x_n - \bar{x})^2 \cdot \lambda^2 + \sigma^2).$$

The maximum likelihood estimate of  $(\beta_0, \beta_1)$  in the localized model thus becomes

$$(\hat{\beta}_0, \hat{\beta}_1) = \operatorname{argmin}_{\beta_0, \beta_1} \sum_{n=1}^N \frac{(y_n - \beta_1(x_n - \bar{x}) - \beta_0)^2}{(x_n - \bar{x})^2 \cdot \lambda^2 + \sigma^2}.$$

This is equivalent to the reweighting approach with

$$w_n = \frac{1}{(x_n - \bar{x})^2 \cdot \lambda^2 + \sigma^2}.$$

We generalize this argument into generalized linear models.

**Theorem 3** *Localization in a GLM with identity link infers  $\beta_1$  from*

$$\begin{aligned} y_n | x_n, \beta_{1n}, \beta_0 &\sim \exp\left(\frac{y_n \cdot \eta_n - b_1(\eta_n)}{a_1(\phi)} + c_1(y_n, \phi)\right), \\ \eta_n &= \beta_0 + \beta_{1n} \cdot (x_n - \bar{x}), \\ \beta_{1n} | \beta_1 &\sim \exp\left(\frac{\beta_{1n} \cdot \beta_1 - b_2(\beta_1)}{a_2(v)} + c_2(\beta_{1n}, v)\right), \end{aligned}$$

where  $a_1(\cdot), a_2(\cdot)$  denote dispersion constants,  $b_1(\cdot), b_2(\cdot)$  denote normalizing constants, and  $c_1(\cdot), c_2(\cdot)$  denote carrier densities of exponential family distributions.

Inferring  $\beta_1$  from this localized GLM is equivalent to inferring  $\beta_1$  from the reweighted model with weights

$$w_n = \mathbb{E}_{p(\beta_{1n} | \beta_1)} \left[ \exp\left(\frac{(y_n - E(y_n | \beta_0 + \tilde{\beta}_{1n}(x_n - \bar{x})))(\beta_{1n} - \beta_1)(x_n - \bar{x})}{a_1(\phi)}\right) \right]$$

for some  $\{\tilde{\beta}_{1n}\}_1^N$ .

**Proof** A classical GLM with an identity link is

$$y_n \sim \exp\left(\frac{y_n \cdot \eta_n - b_1(\eta_n)}{a_1(\phi)} + c_1(y_n, \phi)\right),$$

$$\eta_n = \beta_0 + \beta_1 \cdot (x_n - \bar{x}),$$

whose maximum likelihood estimate calculates

$$(\widehat{\beta}_0, \widehat{\beta}_1) = \operatorname{argmax}_{\beta_0, \beta_1} \prod_{n=1}^N L_{c,n},$$

where

$$L_{c,n} = \exp\left(\frac{y_n \cdot (\beta_0 + \beta_1(x_n - \bar{x})) - b_1(\beta_0 + \beta_1(x_n - \bar{x}))}{a_1(\phi)} + c_1(y_n, \phi)\right).$$

On the other hand, the maximum likelihood estimate of the localized model calculates

$$(\widehat{\beta}_0, \widehat{\beta}_1) = \operatorname{argmax}_{\beta_0, \beta_1} \prod_{n=1}^N L_{l,n},$$

where

$$L_{l,n} = \int \exp\left(\frac{y_n \cdot (\beta_0 + \beta_{1n}(x_n - \bar{x})) - b_1(\beta_0 + \beta_{1n}(x_n - \bar{x}))}{a_1(\phi)} + c_1(y_n, \phi) + \frac{\beta_{1n}\beta_1 - b_2(\beta_1)}{a_2(v)} + c_2(\beta_{1n}, v)\right) d\beta_{1n}.$$

A localized GLM is thus reweighting the likelihood term of each observation by

$$\begin{aligned} \frac{L_{l,n}}{L_{c,n}} &= \int \exp\left(\frac{y_n(\beta_{1n} - \beta_1)(x_n - \bar{x}) - b_1(\beta_0 + \beta_{1n}(x_n - \bar{x})) + b_1(\beta_0 + \beta_1(x_n - \bar{x}))}{a_1(\phi)} + \frac{\beta_{1n}\beta_1 - b_2(\beta_1)}{a_2(v)} + c_2(\beta_{1n}, v)\right) d\beta_{1n} \\ &= \int \exp\left(\frac{y_n(\beta_{1n} - \beta_1)(x_n - \bar{x}) - b'_1(\beta_0 + \tilde{\beta}_{1n}(x_n - \bar{x}))(\beta_{1n} - \beta_1)(x_n - \bar{x})}{a_1(\phi)} + \frac{\beta_{1n}\beta_1 - b_2(\beta_1)}{a_2(v)} + c_2(\beta_{1n}, v)\right) d\beta_{1n} \\ &= \int \exp\left(\frac{(y_n - b'_1(\beta_0 + \tilde{\beta}_{1n}(x_n - \bar{x})))(\beta_{1n} - \beta_1)(x_n - \bar{x})}{a_1(\phi)} + \frac{\beta_{1n}\beta_1 - b_2(\beta_1)}{a_2(v)} + c_2(\beta_{1n}, v)\right) d\beta_{1n} \\ &= E_{p(\beta_{1n}|\beta_1)} \exp\left(\frac{(y_n - E(y_n | \beta_0 + \tilde{\beta}_{1n}(x_n - \bar{x}))) (\beta_{1n} - \beta_1)(x_n - \bar{x})}{a_1(\phi)}\right) \end{aligned}$$

where  $\tilde{\beta}_{1n}$  is some value between  $\beta_1$  and  $\beta_{1n}$  and the second equality is due to mean value theorem. The last equality is due to  $y_n$  residing in the exponential family. ■

## B. Proof sketch of theorem 1

Denote as  $\ell(y | \beta : \beta \in \Theta)$  the statistical model we fit to the data set  $y_1, \dots, y_N \stackrel{iid}{\sim} \bar{P}_N$ .  $\ell(\cdot|\beta)$  is a density function with respect to some carrier measure  $\nu(dy)$ , and  $\Theta$  is the parameter space of  $\beta$ .

Denote the desired true value of  $\beta$  as  $\beta_0$ . Let  $p_0(d\beta)$  be the prior measure absolute continuous in a neighborhood of  $\beta_0$  with a continuous density at  $\beta_0$ . Let  $p_w(dw)$  be the prior measure on weights  $(w_n)_{n=1}^N$ . Finally, let the posterior mean of  $\beta$  under the weighted and unweighted model be  $\bar{\beta}_w$  and  $\bar{\beta}_u$  and the corresponding maximum likelihood estimate (MLE) be  $\hat{\beta}_w$  and  $\hat{\beta}_u$  respectively.

Let us start with some assumptions.

**Assumption 1**  $\ell(\cdot|\beta)$  is twice-differentiable and log-concave.

**Assumption 2** There exist an increasing function  $w(\cdot) : \mathbb{R} \rightarrow \mathbb{R}^+$  such that  $w_n = w(\log \ell(y_n|\beta))$  solves

$$\frac{\partial}{\partial w_n} p_w((w_n)_{n=1}^N) + \log \ell(y_n|\beta) = 0, n = 1, \dots, N.$$

We can immediately see that the bank of Beta( $\alpha, \beta$ ) priors with  $\alpha > 1$  and the bank of Gamma( $k, \theta$ ) priors with  $k > 1$  satisfy this condition.

**Assumption 3**  $P(|\log \ell(y_n | \hat{\beta}_w) - \log \ell(y_n | \beta_0)| < \epsilon) > 1 - \delta_1$  holds  $\forall n$  for some  $\epsilon, \delta_1 > 0$ .

This assumption includes the following two cases: (1)  $\hat{\beta}_w$  is close to the true parameter  $\beta_0$ , i.e. the corruption is not at all influential in parameter estimation, and (2) deviant points in  $y_1, \dots, y_N$  are far enough from typical observations coming from  $\ell(y | \beta_0)$  that  $\log \ell(y_n | \hat{\beta}_w)$  and  $\log \ell(y_n | \beta_0)$  almost coincide. This assumption precisely explains why the RPM performs well in Section 3.

**Assumption 4**  $|\hat{\beta}_u - \beta_0| \geq M$  for some  $M$ .

**Assumption 5** There exist a permutation  $\pi(i) : \{1, \dots, N\} \rightarrow \{1, \dots, N\}$  s.t.

$$P\left(\sum_{n=1}^k \frac{\log \ell(y_{\pi(i)}|\beta_0)'}{\sum_{n=1}^N \log \ell(y_{\pi(i)}|\beta_0)'} \leq \left(1 - \frac{4\epsilon}{M}\right) \sum_{n=1}^k \frac{\log \ell(y_{\pi(i)}|\tilde{\beta}_n)''}{\sum_{n=1}^N \log \ell(y_{\pi(i)}|\tilde{\beta}_n)''}, k = 1, \dots, n-1\right) \geq 1 - \delta_2,$$

for  $\tilde{\beta}_n$  and  $\check{\beta}_n$  between  $\hat{\beta}_u$  and  $\beta_0$  and for some  $\delta_2 > 0$ .

By noticing that  $\sum_{n=1}^N \frac{\log \ell(y_n|\beta_0)'}{\sum_{n=1}^N \log \ell(y_n|\beta_0)'} = 1$ ,  $\sum_{n=1}^N \frac{\log \ell(y_n|\tilde{\beta}_n)''}{\sum_{n=1}^N \log \ell(y_n|\tilde{\beta}_n)''} \left(1 - \frac{4\epsilon}{M}\right) \approx 1$ , and  $\text{Var}(\log \ell(y_n|\beta)') \gg \text{Var}(\log \ell(y_n|\beta)'')$  in general, this assumption is not particularly restrictive. For instance, a normal likelihood has  $\text{Var}(\log \ell(y_n|\beta)'') = 0$ .

**Theorem** Assume Assumption 1-Assumption 5. There exists an  $N^*$  such that for  $N > N^*$ , we have  $|\bar{\beta}_u - \beta_0| \succeq_2 |\bar{\beta}_w - \beta_0|$ , where  $\succeq_2$  denotes second order stochastic dominance.

*Proof Sketch.* We resort to MAP estimates of  $\{w_n\}_1^N$  and  $\delta_1 = \delta_2 = 0$  for simplicity of the sketch.

By Bernstein von-Mises theorem, there exists  $N^*$  s.t.  $N > N^*$  implies the posterior means  $\bar{\beta}_w$  and  $\bar{\beta}_u$  are close to their corresponding MLEs  $\hat{\beta}_w$  and  $\hat{\beta}_u$ . Thus it is sufficient to show instead that  $|\hat{\beta}_u - \beta_0| \left(1 - \frac{4\epsilon}{M}\right) \succeq_2 (|\hat{\beta}_w - \beta_0|)$ .

By mean value theorem, we have

$$|\hat{\beta}_w - \beta_0| = \frac{-\sum_{n=1}^N w(\log \ell(y_n|\beta_0))(\log \ell(y_n|\beta_0)')}{\sum_{n=1}^N w(\log \ell(y_n|\beta_0))(\log \ell(y_n|\tilde{\beta}_n)'')}$$

and

$$|\hat{\beta}_u - \beta_0| = \frac{-\sum_{n=1}^N \log \ell(y_n|\beta_0)'}{\sum_{n=1}^N \log \ell(y_n|\check{\beta}_n)''},$$

where  $\tilde{\beta}_n$  and  $\check{\beta}_n$  are between  $\hat{\beta}_u$  and  $\beta_0$ .

It is thus sufficient to show

$$\left| \sum_{n=1}^N w(\log \ell(y_n | \beta_0)) \frac{\log \ell(y_n | \tilde{\beta}_n)''}{\sum_{n=1}^N \log \ell(y_n | \check{\beta}_n)''} \left(1 - \frac{4\epsilon}{M}\right) \right| \geq 2 \left| \sum_{n=1}^N w(\log \ell(y_n | \beta_0)) \frac{\log \ell(y_n | \beta_0)'}{\sum_{n=1}^N \log \ell(y_n | \beta_0)'} \right|$$

This is true by [Assumption 5](#) and a version of stochastic majorization inequality (e.g. Theorem 7 of ([Egozcue & Wong, 2010](#))). ■

The whole proof of [Theorem 1](#) is to formalize the intuitive argument that if we downweight an observation whenever it deviates from the truth of  $\beta_0$ , our posterior estimate will be closer to  $\beta_0$  than without downweighting, given the presence of these disruptive observations.

### C. Proof sketch of theorem 2

We again resort to MAP estimates of weights for simplicity. Denote a probability distribution with a  $t$ -mass at  $z$  as  $P_t = t\delta_z + (1-t)P_{\beta_0}$ . By differentiating the estimating equation

$$\int \{w(\log \ell(z | \beta)) \log \ell'(z | \beta)\} P_t(z) dz = 0$$

with respect to  $t$ , we obtain that

$$\text{IF}(z; \widehat{\beta}_w, \ell(\cdot | \beta_0)) = J_w(\beta_0)^{-1} \{w(\log \ell(z | \beta_0)) \log \ell'(z | \beta_0)\},$$

where

$$J_w(\beta_0) = \mathbb{E}_{\ell(z | \beta_0)} [w(\log \ell(z | \beta_0)) \log \ell'(z | \beta_0) \log \ell'(z | \beta_0)^\top].$$

It is natural to consider  $z$  with  $\log \ell(z | \beta_0)$  negatively large as an outlier. By investigating the behavior of  $w(a)$  as  $a$  goes to  $-\infty$ , we can easily see that

$$\text{IF}(z; \widehat{\beta}_w, \ell(\cdot | \beta_0)) \rightarrow 0, \text{ as } \log \ell(z | \beta_0) \rightarrow -\infty,$$

if

$$\lim_{a \rightarrow -\infty} w(a) = 0 \text{ and } \lim_{a \rightarrow -\infty} a \cdot w(a) < \infty.$$

## D. Empirical study details

We present details of the four models in [Section 3](#).

### D.1. Corrupted observations

We generate a data set  $\{y_n\}_1^N$  of size  $N = 100$ ,  $(1 - F) \cdot N$  of them from Poisson(5) and  $F \cdot N$  of them from Poisson(50). The corruption rate  $F$  takes values from 0, 0.05, 0.10, ..., 0.45.

The localized Poisson model is

$$\{y_n\}_1^N | \{\theta_n\}_1^N \sim \prod_{n=1}^N \text{Poisson}(y_n | \theta_n),$$

$$\theta_n | \theta \stackrel{iid}{\sim} \mathcal{N}(\theta, \sigma^2),$$

with priors

$$\theta \sim \text{Gamma}(\gamma_a, \gamma_b),$$

$$\sigma^2 \sim \text{lognormal}(0, \nu^2).$$

The RPM is

$$p(\{y_n\}_1^N | \theta, \{w_n\}_1^N) = \left[ \prod_{n=1}^N \text{Poisson}(y_n; \theta)^{w_n} \right] \text{Gamma}(\theta | 2, 0.5) \left[ \prod_{n=1}^N \text{Beta}(w_n; 0.1, 0.01) \right].$$

### D.2. Missing latent groups

We generate a data set  $\{(y_n, x_n)\}_1^N$  of size  $N = 100$ ;  $x_n \sim \text{Unif}(-10, 10)$ ;  $y_n \sim \text{Bernoulli}(1/1 + \exp(-p_n))$  where  $(1 - F) \cdot N$  of them from  $p_n = 0.5x_n$  and  $F \cdot N$  of them from  $p_n = 0.01x_n$ . The missing latent group size  $F$  takes values from 0, 0.05, 0.10, ..., 0.45.

The localized model is

$$y | x \sim \prod_{n=1}^N \text{Bernoulli}(y_n | \text{logit}(\beta_{1n} x_n)),$$

$$\beta_{1n} \sim \mathcal{N}(\beta_1, \sigma^2),$$

with priors

$$\beta_1 \sim \mathcal{N}(0, \tau^2),$$

$$\sigma^2 \sim \text{Gamma}(\gamma_a, \gamma_b).$$

The RPM is

$$p(\{y_n\}_1^N, \beta, \{w_n\}_1^N | \{x_n\}_1^N) = \left[ \prod_{n=1}^N \text{Bernoulli}(y_n; 1/1 + \exp(-\beta x_n))^{w_n} \right] \mathcal{N}(\beta; 0, 10)$$

$$\times \left[ \prod_{n=1}^N \text{Beta}(w_n; 0.1, 0.01) \right].$$

### D.3. Covariate dependence misspecification

We generate a data set  $\{(y_n, x_{1n}, x_{2n})\}_1^N$  of size  $N = 100$ ;  $x_{1n} \stackrel{iid}{\sim} \mathcal{N}(10, 5^2)$ ,  $x_{2n} \stackrel{iid}{\sim} \mathcal{N}(0, 10^2)$ ,  $\beta_{0,1,2,3} \stackrel{iid}{\sim} \text{Unif}(-10, 10)$ ,  $\epsilon_n \stackrel{iid}{\sim} \mathcal{N}(0, 1)$ .

## 1. Missing an interaction term

Data generated from  $y_n = \beta_0 + \beta_1 x_1 + \beta_2 x_2 + \beta_3 x_1 x_2 + \epsilon_n$ .

The localized model is

$$y | (x_1, x_2) \sim \prod_{n=1}^N \mathcal{N}(y_n | \beta_{0n} + \beta_{1n} x_{1n} + \beta_{2n} x_{2n}, \sigma^2),$$

$$\beta_{jn} | \beta_j \stackrel{iid}{\sim} \mathcal{N}(\beta_j, \sigma_j^2),$$

with priors

$$\beta_j \stackrel{iid}{\sim} \mathcal{N}(0, \tau^2), j = 0, 1, 2,$$

$$\sigma_j^2 \stackrel{iid}{\sim} \text{lognormal}(0, \nu^2), j = 0, 1, 2,$$

$$\sigma^2 \sim \text{Gamma}(\gamma_a, \gamma_b).$$

The RPM is

$$p(\{y_n\}_1^N, \beta_{0,1,2}, \{w_n\}_1^N | \{x_{1n}, x_{2n}\}_1^N) = \left[ \prod_{n=1}^N \mathcal{N}(y_n; \beta_0 + \beta_1 x_1 + \beta_2 x_2, \sigma^2)^{w_n} \right]$$

$$\times \text{Gamma}(\sigma^2; 1, 1)$$

$$\times \prod_{j=0}^2 \mathcal{N}(\beta_j; 0, 10) \left[ \prod_{n=1}^N \text{Beta}(w_n; 0.1, 0.01) \right].$$

## 2. Missing a quadratic term

Data generated from  $y_n = \beta_0 + \beta_1 x_1 + \beta_2 x_2 + \beta_3 x_2^2 + \epsilon_n$ .

The localized model is

$$y | (x_1, x_2) \sim \prod_{n=1}^N \mathcal{N}(y_n | \beta_{0n} + \beta_{1n} x_{1n} + \beta_{2n} x_{2n}, \sigma^2),$$

$$\beta_{jn} | \beta_j \stackrel{iid}{\sim} \mathcal{N}(\beta_j, \sigma_j^2),$$

with priors

$$\beta_j \stackrel{iid}{\sim} \mathcal{N}(0, \tau^2), j = 0, 1, 2,$$

$$\sigma_j^2 \stackrel{iid}{\sim} \text{lognormal}(0, \nu^2), j = 0, 1, 2,$$

$$\sigma^2 \sim \text{Gamma}(\gamma_a, \gamma_b).$$

The RPM is

$$p(\{y_n\}_1^N, \beta_{0,1,2}, \{w_n\}_1^N | \{x_{1n}, x_{2n}\}_1^N) = \left[ \prod_{n=1}^N \mathcal{N}(y_n; \beta_0 + \beta_1 x_1 + \beta_2 x_2, \sigma^2)^{w_n} \right]$$

$$\times \text{Gamma}(\sigma^2; 1, 1)$$

$$\times \prod_{j=0}^2 \mathcal{N}(\beta_j; 0, 10) \left[ \prod_{n=1}^N \text{Beta}(w_n; 0.1, 0.01) \right].$$

## 3. Missing a covariate

Data generated from  $y_n = \beta_0 + \beta_1 x_1 + \beta_2 x_2 + \epsilon_n$ .

The localized model is

$$y | (x_1) \sim \prod_{n=1}^N \mathcal{N}(y_n | \beta_{0n} + \beta_{1n}x_{1n}, \sigma^2),$$

$$\beta_{jn} | \beta_j \stackrel{iid}{\sim} \mathcal{N}(\beta_j, \sigma_j^2),$$

with priors

$$\beta_j \stackrel{iid}{\sim} \mathcal{N}(0, \tau^2), j = 0, 1,$$

$$\sigma_j^2 \stackrel{iid}{\sim} \text{lognormal}(0, v^2), j = 0, 1,$$

$$\sigma^2 \sim \text{Gamma}(\gamma_a, \gamma_b).$$

The RPM is The RPM is

$$p(\{y_n\}_1^N, \beta_{0,1}, \{w_n\}_1^N | \{x_{1n}\}_1^N) = \left[ \prod_{n=1}^N \mathcal{N}(y_n; \beta_0 + \beta_1 x_1, \sigma^2)^{w_n} \right]$$

$$\times \text{Gamma}(\sigma^2; 1, 1)$$

$$\times \prod_{j=0}^1 \mathcal{N}(\beta_j; 0, 10) \left[ \prod_{n=1}^N \text{Beta}(w_n; 0.1, 0.01) \right].$$

#### D.4. Skewed distributions

We generate a data set  $\{(x_{1n}, x_{2n})\}_1^N$  of size  $N = 2000$  from a mixture of three skewed normal distributions, with location parameters  $(-2, -2)$ ,  $(3, 0)$ ,  $(-5, 7)$ , scale parameters  $(2, 2)$ ,  $(2, 4)$ ,  $(4, 2)$ , shape parameters  $-5, 10, 15$ , and mixture proportions  $0.3, 0.3, 0.4$ . So the true number of components in this data set is 3.

The RPM is

$$p(\{(x_{1n}, x_{2n})\}_1^N, \{\mu_k\}_1^{30}, \{\Sigma_k\}_1^{30}, \{\pi_k\}_1^{30}, \{w_n\}_1^N)$$

$$= \left[ \prod_{n=1}^N \left[ \sum_{k=1}^{30} \pi_k \mathcal{N}((x_{1n}, x_{2n}); \mu_k, \Sigma_k) \right]^{w_n} \right] \left[ \prod_{k=1}^{30} \mathcal{N}(\mu_{k,1}; 0, 10) \mathcal{N}(\mu_{k,2}; 0, 10) \right]$$

$$\times \left[ \prod_{k=1}^{30} \text{lognormal}(\sigma_{k,1}; 0, 10) \text{lognormal}(\sigma_{k,2}; 0, 10) \right]$$

$$\times \text{Dirichlet}((\pi_k)_1^{30}; \mathbf{1}) \left[ \prod_{n=1}^N \text{Beta}(w_n; 1, 0.05) \right],$$

where  $\mu_k = (\mu_{k,1}, \mu_{k,2})$  and  $\Sigma_k = \begin{pmatrix} \sigma_{k,1}^2 & 0 \\ 0 & \sigma_{k,2}^2 \end{pmatrix}$ .



## E. Poisson factorization model

Poisson factorization models a matrix of count data as a low-dimensional inner product (Cemgil, 2009; Gopalan et al., 2015).

Consider a data set of a matrix sized  $U \times I$  with non-negative integer elements  $x_{ui}$ . In the recommendation example, we have  $U$  users and  $I$  items and each  $x_{ui}$  entry being the rating of user  $u$  on item  $i$ .

The user-reweighted RPM is

$$\begin{aligned}
 p(\{x_{ui}\}_{U \times I}, \{\theta_u\}_1^U, \{\beta_i\}_1^I) = & \left[ \prod_{u=1}^U \left[ \prod_{i=1}^I \text{Poisson}(x_{ui}; \theta_u \top \beta_i) \right]^{w_u} \right] \\
 & \times \left[ \prod_{u=1}^U \prod_{k=1}^K \text{Gamma}(\theta_{u,k}; 1, 0.001) \right] \left[ \prod_{i=1}^I \prod_{k=1}^K \text{Gamma}(\beta_{i,k}; 1, 0.001) \right] \\
 & \times \prod_{u=1}^U \text{Beta}(w_u; 100, 1),
 \end{aligned}$$

where  $K$  is the number of latent dimensions.

**Dataset** . We use the Movielens-1M data set: user-movie ratings collected from a movie recommendation service.<sup>3</sup>

---

<sup>3</sup><http://grouplens.org/datasets/movielens/>

## F. Profile of a downweighted user

Here we show a downweighted user in the RPM analysis of the MovieLens 1M dataset. This user watched 325 movies; we rank her movies according to their popularity in the dataset.

| Title                                                    | Genres                        | %       |
|----------------------------------------------------------|-------------------------------|---------|
| Usual Suspects, The (1995)                               | Crime Thriller                | 45.0489 |
| 2001: A Space Odyssey (1968)                             | Drama Mystery Sci-Fi Thriller | 41.6259 |
| Ghost (1990)                                             | Comedy Romance Thriller       | 32.0293 |
| Lion King, The (1994)                                    | Animation Children's Musical  | 30.7457 |
| Leaving Las Vegas (1995)                                 | Drama Romance                 | 27.3533 |
| Star Trek: Generations (1994)                            | Action Adventure Sci-Fi       | 27.0171 |
| African Queen, The (1951)                                | Action Adventure Romance War  | 26.1614 |
| GoldenEye (1995)                                         | Action Adventure Thriller     | 25.1222 |
| Birdcage, The (1996)                                     | Comedy                        | 19.7433 |
| Much Ado About Nothing (1993)                            | Comedy Romance                | 18.6125 |
| Hudsucker Proxy, The (1994)                              | Comedy Romance                | 17.1760 |
| My Fair Lady (1964)                                      | Musical Romance               | 17.1760 |
| Philadelphia Story, The (1940)                           | Comedy Romance                | 15.5562 |
| James and the Giant Peach (1996)                         | Animation Children's Musical  | 13.8142 |
| Crumb (1994)                                             | Documentary                   | 13.1724 |
| Remains of the Day, The (1993)                           | Drama                         | 12.9279 |
| Adventures of Priscilla, Queen of the Desert, The (1994) | Comedy Drama                  | 12.8362 |
| Reality Bites (1994)                                     | Comedy Drama                  | 12.4389 |
| Notorious (1946)                                         | Film-Noir Romance Thriller    | 12.0416 |
| Brady Bunch Movie, The (1995)                            | Comedy                        | 11.9499 |
| Roman Holiday (1953)                                     | Comedy Romance                | 11.8888 |
| Apartment, The (1960)                                    | Comedy Drama                  | 11.6748 |
| Rising Sun (1993)                                        | Action Drama Mystery          | 11.1858 |
| Bringing Up Baby (1938)                                  | Comedy                        | 11.1553 |
| Bridges of Madison County, The (1995)                    | Drama Romance                 | 10.9413 |
| Pocahontas (1995)                                        | Animation Children's Musical  | 10.8802 |
| Hunchback of Notre Dame, The (1996)                      | Animation Children's Musical  | 10.8191 |
| Mr. Smith Goes to Washington (1939)                      | Drama                         | 10.6663 |
| His Girl Friday (1940)                                   | Comedy                        | 10.5134 |
| Tank Girl (1995)                                         | Action Comedy Musical Sci-Fi  | 10.4218 |
| Adventures of Robin Hood, The (1938)                     | Action Adventure              | 10.0856 |
| Eat Drink Man Woman (1994)                               | Comedy Drama                  | 9.9939  |
| American in Paris, An (1951)                             | Musical Romance               | 9.7188  |
| Secret Garden, The (1993)                                | Children's Drama              | 9.3215  |
| Short Cuts (1993)                                        | Drama                         | 9.0465  |
| Six Degrees of Separation (1993)                         | Drama                         | 8.8325  |
| First Wives Club, The (1996)                             | Comedy                        | 8.6797  |
| Age of Innocence, The (1993)                             | Drama                         | 8.3435  |
| Father of the Bride (1950)                               | Comedy                        | 8.2213  |
| My Favorite Year (1982)                                  | Comedy                        | 8.1601  |
| Shadowlands (1993)                                       | Drama Romance                 | 8.1601  |
| Some Folks Call It a Sling Blade (1993)                  | Drama Thriller                | 8.0990  |
| Little Women (1994)                                      | Drama                         | 8.0379  |
| Kids in the Hall: Brain Candy (1996)                     | Comedy                        | 7.9768  |
| Cat on a Hot Tin Roof (1958)                             | Drama                         | 7.7017  |
| Corrina, Corrina (1994)                                  | Comedy Drama Romance          | 7.3961  |
| Muppet Treasure Island (1996)                            | Adventure Comedy Musical      | 7.3655  |
| 39 Steps, The (1935)                                     | Thriller                      | 7.2127  |
| Farewell My Concubine (1993)                             | Drama Romance                 | 7.2127  |
| Renaissance Man (1994)                                   | Comedy Drama War              | 7.1210  |
| With Honors (1994)                                       | Comedy Drama                  | 6.7543  |
| Virtuosity (1995)                                        | Sci-Fi Thriller               | 6.7543  |
| Cold Comfort Farm (1995)                                 | Comedy                        | 6.4792  |

## Robust Probabilistic Modeling with Bayesian Data Reweighting

---

|                                                 |                              |        |
|-------------------------------------------------|------------------------------|--------|
| Man Without a Face, The (1993)                  | Drama                        | 6.4181 |
| East of Eden (1955)                             | Drama                        | 6.2958 |
| Three Colors: White (1994)                      | Drama                        | 5.9597 |
| Shadow, The (1994)                              | Action                       | 5.9291 |
| Boomerang (1992)                                | Comedy Romance               | 5.6846 |
| Hellraiser: Bloodline (1996)                    | Action Horror Sci-Fi         | 5.6540 |
| Basketball Diaries, The (1995)                  | Drama                        | 5.5318 |
| My Man Godfrey (1936)                           | Comedy                       | 5.3790 |
| Very Brady Sequel, A (1996)                     | Comedy                       | 5.3484 |
| Screamers (1995)                                | Sci-Fi Thriller              | 5.2567 |
| Richie Rich (1994)                              | Children's Comedy            | 5.1956 |
| Beautiful Girls (1996)                          | Drama                        | 5.1650 |
| Meet Me in St. Louis (1944)                     | Musical                      | 5.1650 |
| Ghost and Mrs. Muir, The (1947)                 | Drama Romance                | 4.9817 |
| Waiting to Exhale (1995)                        | Comedy Drama                 | 4.9817 |
| Boxing Helena (1993)                            | Mystery Romance Thriller     | 4.7983 |
| Belle de jour (1967)                            | Drama                        | 4.7983 |
| Goofy Movie, A (1995)                           | Animation Children's Comedy  | 4.6760 |
| Spitfire Grill, The (1996)                      | Drama                        | 4.6760 |
| Village of the Damned (1995)                    | Horror Sci-Fi                | 4.6149 |
| Dracula: Dead and Loving It (1995)              | Comedy Horror                | 4.5232 |
| Twelfth Night (1996)                            | Comedy Drama Romance         | 4.5232 |
| Dead Man (1995)                                 | Western                      | 4.4927 |
| Miracle on 34th Street (1994)                   | Drama                        | 4.4621 |
| Halloween: The Curse of Michael Myers (1995)    | Horror Thriller              | 4.4315 |
| Once Were Warriors (1994)                       | Crime Drama                  | 4.3704 |
| Kid in King Arthur's Court, A (1995)            | Adventure Comedy Fantasy     | 4.3399 |
| Road to Wellville, The (1994)                   | Comedy                       | 4.3399 |
| Restoration (1995)                              | Drama                        | 4.2176 |
| Oliver & Company (1988)                         | Animation Children's         | 4.0648 |
| Basquiat (1996)                                 | Drama                        | 3.9731 |
| Pagemaster, The (1994)                          | Adventure Animation Fantasy  | 3.8814 |
| Giant (1956)                                    | Drama                        | 3.8509 |
| Surviving the Game (1994)                       | Action Adventure Thriller    | 3.8509 |
| City Hall (1996)                                | Drama Thriller               | 3.8509 |
| Herbie Rides Again (1974)                       | Adventure Children's Comedy  | 3.7897 |
| Backbeat (1993)                                 | Drama Musical                | 3.6675 |
| Umbrellas of Cherbourg, The (1964)              | Drama Musical                | 3.5758 |
| Ruby in Paradise (1993)                         | Drama                        | 3.5452 |
| Mrs. Winterbourne (1996)                        | Comedy Romance               | 3.4841 |
| Bed of Roses (1996)                             | Drama Romance                | 3.4841 |
| Chungking Express (1994)                        | Drama Mystery Romance        | 3.3619 |
| Free Willy 2: The Adventure Home (1995)         | Adventure Children's Drama   | 3.3313 |
| Party Girl (1995)                               | Comedy                       | 3.2702 |
| Solo (1996)                                     | Action Sci-Fi Thriller       | 3.1785 |
| Stealing Beauty (1996)                          | Drama                        | 3.1479 |
| Burnt By the Sun (Utomlyonnye solntsem) (1994)  | Drama                        | 3.1479 |
| Naked (1993)                                    | Drama                        | 2.9034 |
| Kicking and Screaming (1995)                    | Comedy Drama                 | 2.9034 |
| Jeffrey (1995)                                  | Comedy                       | 2.8729 |
| Made in America (1993)                          | Comedy                       | 2.8423 |
| Lawnmower Man 2: Beyond Cyberspace (1996)       | Sci-Fi Thriller              | 2.8117 |
| Davy Crockett, King of the Wild Frontier (1955) | Western                      | 2.7812 |
| Vampire in Brooklyn (1995)                      | Comedy Romance               | 2.7506 |
| NeverEnding Story III, The (1994)               | Adventure Children's Fantasy | 2.6895 |
| Candyman: Farewell to the Flesh (1995)          | Horror                       | 2.6284 |
| Air Up There, The (1994)                        | Comedy                       | 2.6284 |

## Robust Probabilistic Modeling with Bayesian Data Reweighting

---

|                                                            |                      |        |
|------------------------------------------------------------|----------------------|--------|
| High School High (1996)                                    | Comedy               | 2.5978 |
| Young Poisoner's Handbook, The (1995)                      | Crime                | 2.5367 |
| Jane Eyre (1996)                                           | Drama Romance        | 2.5367 |
| Jury Duty (1995)                                           | Comedy               | 2.4756 |
| Girl 6 (1996)                                              | Comedy               | 2.4450 |
| Farinelli: il castrato (1994)                              | Drama Musical        | 2.3227 |
| Chamber, The (1996)                                        | Drama                | 2.2616 |
| Blue in the Face (1995)                                    | Comedy               | 2.2005 |
| Little Buddha (1993)                                       | Drama                | 2.2005 |
| King of the Hill (1993)                                    | Drama                | 2.1699 |
| Shanghai Triad (Yao a yao dao waipo qiao) (1995)           | Drama                | 2.1699 |
| Scarlet Letter, The (1995)                                 | Drama                | 2.1699 |
| Blue Chips (1994)                                          | Drama                | 2.1394 |
| House of the Spirits, The (1993)                           | Drama Romance        | 2.1394 |
| Tom and Huck (1995)                                        | Adventure Children's | 2.0477 |
| Life with Mikey (1993)                                     | Comedy               | 2.0477 |
| For Love or Money (1993)                                   | Comedy               | 2.0171 |
| Princess Caraboo (1994)                                    | Drama                | 1.9560 |
| Addiction, The (1995)                                      | Horror               | 1.9560 |
| Mrs. Parker and the Vicious Circle (1994)                  | Drama                | 1.9254 |
| Cops and Robbers (1994)                                    | Comedy               | 1.9254 |
| Wonderful, Horrible Life of Leni Riefenstahl, The (1993)   | Documentary          | 1.8949 |
| Strawberry and Chocolate (Fresa y chocolate) (1993)        | Drama                | 1.8949 |
| Bread and Chocolate (Pane e cioccolata) (1973)             | Drama                | 1.8643 |
| Of Human Bondage (1934)                                    | Drama                | 1.8643 |
| To Live (Huozhe) (1994)                                    | Drama                | 1.8337 |
| Now and Then (1995)                                        | Drama                | 1.8337 |
| Flipper (1996)                                             | Adventure Children's | 1.8032 |
| Mr. Wrong (1996)                                           | Comedy               | 1.8032 |
| Before and After (1996)                                    | Drama Mystery        | 1.7115 |
| Maya Lin: A Strong Clear Vision (1994)                     | Documentary          | 1.6504 |
| Horseman on the Roof, The (Hussard sur le toit, Le) (1995) | Drama                | 1.6504 |
| Moonlight and Valentino (1995)                             | Drama Romance        | 1.6504 |
| Andre (1994)                                               | Adventure Children's | 1.6504 |
| House Arrest (1996)                                        | Comedy               | 1.6198 |
| Celtic Pride (1996)                                        | Comedy               | 1.6198 |
| Amateur (1994)                                             | Crime Drama Thriller | 1.6198 |
| White Man's Burden (1995)                                  | Drama                | 1.5892 |
| Heidi Fleiss: Hollywood Madam (1995)                       | Documentary          | 1.5892 |
| Adventures of Pinocchio, The (1996)                        | Adventure Children's | 1.5892 |
| National Lampoon's Senior Trip (1995)                      | Comedy               | 1.5587 |
| Angel and the Badman (1947)                                | Western              | 1.5587 |
| Poison Ivy II (1995)                                       | Thriller             | 1.5281 |
| Bitter Moon (1992)                                         | Drama                | 1.4976 |
| Perez Family, The (1995)                                   | Comedy Romance       | 1.4670 |
| Georgia (1995)                                             | Drama                | 1.4364 |
| Love in the Afternoon (1957)                               | Comedy Romance       | 1.4059 |
| Inkwell, The (1994)                                        | Comedy Drama         | 1.4059 |
| Bloodsport 2 (1995)                                        | Action               | 1.4059 |
| Bad Company (1995)                                         | Action               | 1.3753 |
| Underneath, The (1995)                                     | Mystery Thriller     | 1.3753 |
| Widows' Peak (1994)                                        | Drama                | 1.3447 |
| Alaska (1996)                                              | Adventure Children's | 1.2836 |
| Jefferson in Paris (1995)                                  | Drama                | 1.2531 |
| Penny Serenade (1941)                                      | Drama Romance        | 1.2531 |
| Big Green, The (1995)                                      | Children's Comedy    | 1.2531 |
| What Happened Was... (1994)                                | Comedy Drama Romance | 1.2531 |

## Robust Probabilistic Modeling with Bayesian Data Reweighting

---

|                                                        |                      |        |
|--------------------------------------------------------|----------------------|--------|
| Great Day in Harlem, A (1994)                          | Documentary          | 1.1919 |
| Underground (1995)                                     | War                  | 1.1919 |
| House Party 3 (1994)                                   | Comedy               | 1.1614 |
| Roommates (1995)                                       | Comedy Drama         | 1.1614 |
| Getting Even with Dad (1994)                           | Comedy               | 1.1308 |
| Cry, the Beloved Country (1995)                        | Drama                | 1.1308 |
| Stalingrad (1993)                                      | War                  | 1.1308 |
| Endless Summer 2, The (1994)                           | Documentary          | 1.1308 |
| Browning Version, The (1994)                           | Drama                | 1.1308 |
| Fluke (1995)                                           | Children's Drama     | 1.1002 |
| Scarlet Letter, The (1926)                             | Drama                | 1.1002 |
| Pyromaniac's Love Story, A (1995)                      | Comedy Romance       | 1.0697 |
| Castle Freak (1995)                                    | Horror               | 1.0697 |
| Double Happiness (1994)                                | Drama                | 1.0697 |
| Month by the Lake, A (1995)                            | Comedy Drama         | 1.0391 |
| Once Upon a Time... When We Were Colored (1995)        | Drama                | 1.0391 |
| Favor, The (1994)                                      | Comedy Romance       | 1.0086 |
| Manny & Lo (1996)                                      | Drama                | 1.0086 |
| Visitors, The (Les Visiteurs) (1993)                   | Comedy Sci-Fi        | 1.0086 |
| Carpool (1996)                                         | Comedy Crime         | 0.9780 |
| Total Eclipse (1995)                                   | Drama Romance        | 0.9780 |
| Panther (1995)                                         | Drama                | 0.9474 |
| Lassie (1994)                                          | Adventure Children's | 0.9474 |
| It's My Party (1995)                                   | Drama                | 0.9169 |
| Kaspar Hauser (1993)                                   | Drama                | 0.9169 |
| It Takes Two (1995)                                    | Comedy               | 0.9169 |
| Purple Noon (1960)                                     | Crime Thriller       | 0.8863 |
| Nadja (1994)                                           | Drama                | 0.8557 |
| Haunted World of Edward D. Wood Jr., The (1995)        | Documentary          | 0.8557 |
| Dear Diary (Caro Diario) (1994)                        | Comedy Drama         | 0.8252 |
| Faces (1968)                                           | Drama                | 0.8252 |
| Love & Human Remains (1993)                            | Comedy               | 0.7946 |
| Man of the House (1995)                                | Comedy               | 0.7946 |
| Curdled (1996)                                         | Crime                | 0.7641 |
| Jack and Sarah (1995)                                  | Romance              | 0.7641 |
| Denise Calls Up (1995)                                 | Comedy               | 0.7641 |
| Aparajito (1956)                                       | Drama                | 0.7641 |
| Hunted, The (1995)                                     | Action               | 0.7641 |
| Colonel Chabert, Le (1994)                             | Drama Romance War    | 0.7335 |
| Thin Line Between Love and Hate, A (1996)              | Comedy               | 0.7335 |
| Nina Takes a Lover (1994)                              | Comedy Romance       | 0.7335 |
| Ciao, Professore! (Io speriamo che me la cavo ) (1993) | Drama                | 0.7029 |
| In the Bleak Midwinter (1995)                          | Comedy               | 0.7029 |
| Naked in New York (1994)                               | Comedy Romance       | 0.7029 |
| Maybe, Maybe Not (Bewegte Mann, Der) (1994)            | Comedy               | 0.6724 |
| Police Story 4: Project S (Chao ji ji hua) (1993)      | Action               | 0.6418 |
| Algiers (1938)                                         | Drama Romance        | 0.6418 |
| Tom & Viv (1994)                                       | Drama                | 0.6418 |
| Cold Fever (A koldum klaka) (1994)                     | Comedy Drama         | 0.6112 |
| Amazing Panda Adventure, The (1995)                    | Adventure Children's | 0.6112 |
| Marlene Dietrich: Shadow and Light (1996)              | Documentary          | 0.6112 |
| Jupiter's Wife (1994)                                  | Documentary          | 0.6112 |
| Stars Fell on Henrietta, The (1995)                    | Drama                | 0.6112 |
| Careful (1992)                                         | Comedy               | 0.5807 |
| Kika (1993)                                            | Drama                | 0.5807 |
| Loaded (1994)                                          | Drama Thriller       | 0.5501 |
| Killer (Bulletproof Heart) (1994)                      | Thriller             | 0.5501 |

## Robust Probabilistic Modeling with Bayesian Data Reweighting

---

|                                                    |                       |        |
|----------------------------------------------------|-----------------------|--------|
| Clean Slate (Coup de Torchon) (1981)               | Crime                 | 0.5501 |
| Killer: A Journal of Murder (1995)                 | Crime Drama           | 0.5501 |
| 301, 302 (1995)                                    | Mystery               | 0.5196 |
| New Jersey Drive (1995)                            | Crime Drama           | 0.5196 |
| Gold Diggers: The Secret of Bear Mountain (1995)   | Adventure Children's  | 0.4890 |
| Spirits of the Dead (Tre Passi nel Delirio) (1968) | Horror                | 0.4890 |
| Fear, The (1995)                                   | Horror                | 0.4890 |
| From the Journals of Jean Seberg (1995)            | Documentary           | 0.4890 |
| Celestial Clockwork (1994)                         | Comedy                | 0.4584 |
| They Made Me a Criminal (1939)                     | Crime Drama           | 0.4584 |
| Man of the Year (1995)                             | Documentary           | 0.4584 |
| New Age, The (1994)                                | Drama                 | 0.4279 |
| Reluctant Debutante, The (1958)                    | Comedy Drama          | 0.4279 |
| Savage Nights (Nuits fauves, Les) (1992)           | Drama                 | 0.4279 |
| Faithful (1996)                                    | Comedy                | 0.4279 |
| Land and Freedom (Tierra y libertad) (1995)        | War                   | 0.4279 |
| Boys (1996)                                        | Drama                 | 0.3973 |
| Big Squeeze, The (1996)                            | Comedy Drama          | 0.3973 |
| Gumby: The Movie (1995)                            | Animation Children's  | 0.3973 |
| All Things Fair (1996)                             | Drama                 | 0.3973 |
| Kim (1950)                                         | Children's Drama      | 0.3667 |
| Infinity (1996)                                    | Drama                 | 0.3667 |
| Peanuts - Die Bank zahlt alles (1996)              | Comedy                | 0.3667 |
| Ed's Next Move (1996)                              | Comedy                | 0.3667 |
| Hour of the Pig, The (1993)                        | Drama Mystery         | 0.3667 |
| Walk in the Sun, A (1945)                          | Drama                 | 0.3667 |
| Death in the Garden (Mort en ce jardin, La) (1956) | Drama                 | 0.3362 |
| Collectionneuse, La (1967)                         | Drama                 | 0.3362 |
| They Bite (1996)                                   | Drama                 | 0.3362 |
| Original Gangstas (1996)                           | Crime                 | 0.3362 |
| Gordy (1995)                                       | Comedy                | 0.3362 |
| Last Klezmer, The (1995)                           | Documentary           | 0.3056 |
| Butterfly Kiss (1995)                              | Thriller              | 0.3056 |
| Talk of Angels (1998)                              | Drama                 | 0.3056 |
| In the Line of Duty 2 (1987)                       | Action                | 0.3056 |
| Tarantella (1995)                                  | Drama                 | 0.3056 |
| Under the Domin Tree (Etz Hadomim Tafus) (1994)    | Drama                 | 0.2751 |
| Dingo (1992)                                       | Drama                 | 0.2751 |
| Billy's Holiday (1995)                             | Drama                 | 0.2751 |
| Venice/Venice (1992)                               | Drama                 | 0.2751 |
| Low Life, The (1994)                               | Drama                 | 0.2751 |
| Phat Beach (1996)                                  | Comedy                | 0.2751 |
| Catwalk (1995)                                     | Documentary           | 0.2751 |
| Fall Time (1995)                                   | Drama                 | 0.2445 |
| Scream of Stone (Schrei aus Stein) (1991)          | Drama                 | 0.2445 |
| Frank and Ollie (1995)                             | Documentary           | 0.2445 |
| Bye-Bye (1995)                                     | Drama                 | 0.2445 |
| Tigrero: A Film That Was Never Made (1994)         | Documentary Drama     | 0.2445 |
| Wend Kuuni (God's Gift) (1982)                     | Drama                 | 0.2445 |
| Sonic Outlaws (1995)                               | Documentary           | 0.2445 |
| Getting Away With Murder (1996)                    | Comedy                | 0.2445 |
| Fausto (1993)                                      | Comedy                | 0.2445 |
| Brothers in Trouble (1995)                         | Drama                 | 0.2445 |
| Foreign Student (1994)                             | Drama                 | 0.2445 |
| Tough and Deadly (1995)                            | Action Drama Thriller | 0.2445 |
| Moonlight Murder (1936)                            | Mystery               | 0.2445 |
| Schlafes Bruder (Brother of Sleep) (1995)          | Drama                 | 0.2139 |

---

**Robust Probabilistic Modeling with Bayesian Data Reweighting**

---

|                                                    |                       |        |
|----------------------------------------------------|-----------------------|--------|
| Metisse (Cafe au Lait) (1993)                      | Comedy                | 0.2139 |
| Promise, The (Versprechen, Das) (1994)             | Romance               | 0.2139 |
| Und keiner weint mir nach (1996)                   | Drama Romance         | 0.2139 |
| Hungarian Fairy Tale, A (1987)                     | Fantasy               | 0.2139 |
| Liebelei (1933)                                    | Romance               | 0.2139 |
| Paris, France (1993)                               | Comedy                | 0.2139 |
| Girl in the Cadillac (1995)                        | Drama                 | 0.2139 |
| Hostile Intentions (1994)                          | Action Drama Thriller | 0.2139 |
| Two Bits (1995)                                    | Drama                 | 0.2139 |
| Rent-a-Kid (1995)                                  | Comedy                | 0.2139 |
| Beyond Bedlam (1993)                               | Drama Horror          | 0.2139 |
| Touki Bouki (Journey of the Hyena) (1973)          | Drama                 | 0.2139 |
| Convent, The (Convento, O) (1995)                  | Drama                 | 0.2139 |
| Open Season (1996)                                 | Comedy                | 0.2139 |
| Lotto Land (1995)                                  | Drama                 | 0.1834 |
| Frisk (1995)                                       | Drama                 | 0.1834 |
| Shadow of Angels (Schatten der Engel) (1976)       | Drama                 | 0.1834 |
| Yankee Zulu (1994)                                 | Comedy Drama          | 0.1834 |
| Last of the High Kings, The (1996)                 | Drama                 | 0.1834 |
| Sunset Park (1996)                                 | Drama                 | 0.1834 |
| Happy Weekend (1996)                               | Comedy                | 0.1834 |
| Criminals (1996)                                   | Documentary           | 0.1834 |
| Happiness Is in the Field (1995)                   | Comedy                | 0.1528 |
| Associate, The (L' Associe)(1982)                  | Comedy                | 0.1528 |
| Target (1995)                                      | Action Drama          | 0.1528 |
| Relative Fear (1994)                               | Horror Thriller       | 0.1528 |
| Honigmond (1996)                                   | Comedy                | 0.1528 |
| Eye of Vichy, The (Oeil de Vichy, L') (1993)       | Documentary           | 0.1528 |
| Sweet Nothing (1995)                               | Drama                 | 0.1528 |
| Harlem (1993)                                      | Drama                 | 0.1528 |
| Condition Red (1995)                               | Action Drama Thriller | 0.1528 |
| Homage (1995)                                      | Drama                 | 0.1528 |
| Superweib, Das (1996)                              | Comedy                | 0.1222 |
| Halfmoon (Paul Bowles - Halbmond) (1995)           | Drama                 | 0.1222 |
| Silence of the Palace, The (Saimt el Qusur) (1994) | Drama                 | 0.1222 |
| Headless Body in Topless Bar (1995)                | Comedy                | 0.1222 |
| Rude (1995)                                        | Drama                 | 0.1222 |
| Garcu, Le (1995)                                   | Drama                 | 0.1222 |
| Guardian Angel (1994)                              | Action Drama Thriller | 0.1222 |
| Roula (1995)                                       | Drama                 | 0.0917 |
| Jar, The (Khomreh) (1992)                          | Drama                 | 0.0917 |
| Small Faces (1995)                                 | Drama                 | 0.0917 |
| New York Cop (1996)                                | Action Crime          | 0.0917 |
| Century (1993)                                     | Drama                 | 0.0917 |

---

## References

- Cemgil, Ali Taylan. Bayesian inference for nonnegative matrix factorisation models. *Computational Intelligence and Neuroscience*, 2009, 2009.
- Egozcue, Martin and Wong, Wing-Keung. Gains from diversification on convex combinations: A majorization and stochastic dominance approach. *European Journal of Operational Research*, 200(3):893–900, 2010.
- Gopalan, Prem, Hofman, Jake M, and Blei, David M. Scalable recommendation with hierarchical Poisson factorization. *UAI*, 2015.
